1 **BACK Complaints in the Elders - Chiropractic (BACE-C):**

2 **Design of a cohort study in chiropractic care**

3

4 Alan D. Jenks<sup>1</sup>, Trynke Hoekstra<sup>2</sup>, Iben Axén<sup>3</sup>, Katie de Luca<sup>4</sup>, Jonathan Field<sup>5</sup>, Dave Newell<sup>6</sup>, Jan  
5 Hartvigsen<sup>7,8</sup>, Simon D. French<sup>4</sup>, Bart Koes<sup>9,10</sup>, Maurits W. van Tulder<sup>1,11</sup>, Sidney M. Rubinstein<sup>1</sup>

6

7 **Affiliations**

8 1. Department of Health Sciences and Amsterdam Movement Science, Faculty of Science, Vrije  
9 Universiteit, Amsterdam, Netherlands.

10 2. Department of Health Sciences and Amsterdam Public Health research institute, Faculty of Science, Vrije  
11 Universiteit, Amsterdam, Netherlands.

12 3. Unit of Intervention and Implementation Research for Worker Health, Institute of Environmental  
13 Medicine, Karolinska Institutet, Stockholm, Sweden.

14 4. Department of Chiropractic, Faculty of Science and Engineering, Macquarie University, Sydney,  
15 Australia.

16 5. Back Active, Private Practice, Portsmouth, Southsea, UK.

17 6. AECC University College, Bournemouth, UK.

18 7. Department of Sports Science and Clinical Biomechanics, University of Southern Denmark, Odense M,  
19 Denmark.

20 8. Nordic Institute of Chiropractic and Clinical Biomechanics, University of Southern Denmark, Odense,  
21 Denmark.

22 9. Department of General Practice, Erasmus MC, University Medical Center Rotterdam, the Netherlands.

23 10. Center for Muscle and Joint Health, University of Southern Denmark, Odense, Denmark.

24 11. Department of Physiotherapy & Occupational Therapy, Aarhus University Hospital, Aarhus, Denmark.

25

1

26 Figures: Figure 1

27 Tables: Table 1

28 **Abstract**

29 Background: Low back pain is a common condition among older adults that significantly influences  
30 physical function and participation. Compared to their younger counterparts, there is limited information  
31 available about the clinical course of low back pain in older people, in particularly those presenting for  
32 chiropractic care. Improving our understanding of this patient population and the course of their low back  
33 pain may provide input for studies researching safer and more effective care than is currently provided.

34 Objectives: The primary objectives are to examine the clinical course over one year of the intensity,  
35 healthcare costs and improvement rates of low back pain in people 55 years and older who visit a  
36 chiropractor for a new episode of low back pain.

37 Methods: An international prospective, multi-center cohort study with one-year follow-up. Chiropractic  
38 practices are to be recruited in the Netherlands, Sweden, United Kingdom and Australia. Treatment will be  
39 left to the discretion of the chiropractor. Inclusion/Exclusion criteria: Patients 55 years and older who are  
40 accepted for care having presented to a chiropractor with a new episode of low back pain and who have not  
41 been to a chiropractor in the previous six months for an episode of low back pain are to be included,  
42 independent of whether or not they have seen another type of health care provider. Patients who are unable  
43 to complete the web-based questionnaires because of language restrictions or those with computer literacy  
44 restrictions will be excluded as well as those with cognitive disorders. In addition, those with a suspected  
45 tumor, fracture, infection or any other potential red flag or condition considered to be a contraindication for  
46 chiropractic care will be excluded. Data will be collected using online questionnaires at baseline, and at 2  
47 and 6 weeks and at 3, 6, 9 and 12 months.

48 *Trial Registration:* Nederlandse Trial Registrar NL7507

49 *Keywords*

50 Ageing, chronic pain, epidemiology, low back pain, aged, elderly, spinal manipulation, chiropractic

## 51 **Background**

52 Worldwide, low back pain is the leading cause of years lived with disability and contributes to the global  
53 burden of disease (1,2). Low back pain is associated with decreased mobility, reduced social participation,  
54 increased isolation and difficulty with activities of daily living and thus has a negative effect on overall  
55 health-related quality-of-life in older adults. Older adults with low back pain also more commonly suffer  
56 from a range of co-morbidities when compared to those without low back pain (3,4). This results in large  
57 costs of care, which are estimated to exceed €400 billion per year worldwide (5).

58 Low back pain is generally more severe with increasing age (6). For example, one in every four people  
59 aged >80 years will report moderate to severe low back pain and people aged >80 years are three times  
60 more likely to have high intensity low back pain (scores >50, on a zero to 100 scale) than those aged 50-59  
61 years (7). One-fifth of older adults with low back pain report difficulties in caring for themselves at home  
62 or participating in family- and social activities (8). Older people seeking care because of low back pain  
63 more commonly receive treatments that have been shown to be ineffective and harmful such as opioid  
64 prescription, spinal injections or surgery than younger people seeking care for low back pain (9).

65 Chiropractors provide a significant portion of care for patients with low back pain (10), and care from  
66 chiropractors in the younger and older population appears to be safe and effective (16–18). Unfortunately,  
67 existing trials have typically included only younger adults with low back pain, and exclude older adults for  
68 various complicating reasons, such as comorbidity and polypharmacy (19-21). As a significant proportion  
69 of chiropractors treat older adults (16), it is important to understand the course and characteristics of low  
70 back pain in older adults under this care. Perhaps more importantly, chiropractic care may delay functional  
71 decline in older adults and improve self-rated health (17,18).

72 In short, there is a general lack of knowledge regarding low back pain in older adults, but more importantly,  
73 data are lacking on course of low back pain for this population in a chiropractic setting (15,19).

74 The current BACE-C consortium study has been modelled after the ‘BACk Complaints in Elders’ study  
75 (BACE), which is an international cohort study devoted to examining back complaints in older people in  
76 primary care (23). The BACE-C study is set in chiropractic care. The primary objectives are to examine the  
77 clinical course over one year of the intensity, healthcare costs and improvement rates of low back pain in  
78 people 55 years and older who visit a chiropractor for a new episode of low back pain.

## 79 **Methods**

80 Study design. This study is designed as an international, multi-center prospective cohort study. Data are to  
81 be collected from patients 55 and older with low back pain who visit a chiropractor. Follow-up  
82 measurements will be scheduled at 2 weeks, 6 weeks, 3 months, 6 months, 9 months and at one year after  
83 the first treatment. Participants are to be recruited from the private practices of chiropractors in the  
84 Netherlands, Sweden, Australia and the United Kingdom using the same recruitment strategies. The  
85 procedures and design outlined in this paper are to be followed by the participating countries and describe  
86 a common set of primary outcome measures and patient- and chiropractic factors to be measured. Care will  
87 be at the discretion of the participating chiropractors. Ethics approval will be obtained in each participating  
88 country prior to data collection.

89

### 90 *Participants*

91 Inclusion criteria: Patients aged 55 and older who consult a chiropractor for an episode of low back pain  
92 regardless of duration, either for the first time or patients who have not been to a chiropractor in the previous  
93 six months are to be recruited, independent of whether or not they have seen another type of health care  
94 provider for the current episode. All low back complaints, with pain in the region from the thoracolumbar  
95 12th rib junction to the first sacral vertebrae, including pelvic pain and pain referral to the leg(s) are to be  
96 included.

97 Exclusion criteria: Patients who are unable to complete the web-based questionnaires because of language  
98 restrictions or computer literacy restrictions will be excluded as well as those with cognitive disorders. In  
99 addition, those with a suspected tumor, fracture, infection or any other potential red flag or condition  
100 considered to be a contraindication for chiropractic care will be excluded.

101

### 102 *Inclusion Procedure*

103 Participating chiropractors will be asked to refer all potential participants who fulfill the inclusion criteria  
104 to the online questionnaire, preferably prior to the first appointment. Participants will be briefly informed  
105 about the study procedures over the phone when they call to make an appointment or during the initial  
106 consultation with the chiropractor. The chiropractor or chiropractic assistant will ask for the patient's  
107 permission to send an email with a link to the informed consent and baseline questionnaire, so that it can

108 be completed at home prior to the first visit or as soon as possible and no later than two weeks after the  
109 initial visit. Figure 1 shows the proposed flow of patient inclusion.

110

### 111 *Questionnaires*

112 Links to the questionnaires will be sent by email and completed as a web-based questionnaire at baseline,  
113 2 and 6 weeks, and at 3, 6, 9 and 12 months after the initial visit. In Sweden data will not be collected after  
114 6 weeks because of logistical burden. Table 1 shows the measurements per follow-up round and the time  
115 frame for data collection.

116 The primary outcome measures are: 1) low back pain intensity, 2) back-specific functional status and 3)  
117 global perceived effect. As a secondary measure, 4) healthcare costs will be measured. All outcomes are  
118 self-reported.

119 Patient-related factors: The following factors will be measured at baseline: 1) sociodemographic  
120 characteristics (i.e. age, gender, marital status, education level, height, weight); 2) physical activity  
121 (measured with the International Physical Activity questionnaire (20)); 3) other lifestyle variables smoking;  
122 measured by pack years (21), alcohol use measured by the short version of the AUDIT-C (22,23), sleeping  
123 habits; measured by the short version of the Pittsburgh Sleep Quality Index (24); 4) comorbidities using  
124 the Self-administered Comorbidity Questionnaire (25) and 7) indicator screening tool (STarT Back) for  
125 poor outcome (26) and 5) quality-of-life measured with the EQ-5D-5L at baseline only. In Sweden the EQ-  
126 5D-3L will be used. The EQ-5D measures five dimensions: mobility, self-care, usual activities,  
127 pain/discomfort and anxiety/depression (28,29).

128 In the Netherlands, each chiropractor will also perform at the first consult the “timed Up & Go” test (30).  
129 The “timed Up & Go” test is composed of a variety of movements which are necessary for daily activities:  
130 walking, standing up, turning, stopping, and sitting down; and predictive of falls in the elderly (30). In  
131 previous studies, this test showed associations with quality-of-life scores (31).

132 Pain: Pain intensity will first be measured using an 11-point numerical rating scale (NRS) (32) in which 0  
133 represents ‘no pain’ and 10 represents ‘the worst pain ever’. Second, several questions about the severity  
134 and reoccurrence of complaints will be asked at all follow-up measurements (table 1).

135 Back-specific functional status: Functional status will be measured at baseline and all follow-up intervals  
136 using the Roland Morris Disability Questionnaire (RMDQ) (33), in which total score can range from 0 (no  
137 disabilities) to 24 (severe disabilities).

138 Global perceived effect: Global perceived effect (GPE) will be measured on a 7-point scale, ranging from  
139 ‘completely recovered’ to ‘worse than ever’ (33,34). Patients will be asked to provide additional (open-  
140 ended) explanation if they report worse or much worse global perceived effect compared to the previous  
141 follow-up measurement. GPE will be dichotomized for the analyses as follows: ‘completely recovered’ and  
142 ‘much better’ will be considered ‘improved’, while all other responses will be considered ‘not improved’  
143 (35).

144 Healthcare consumption: Healthcare consumption will include the use of all primary health care (e.g.  
145 general practitioner, physiotherapist), all secondary healthcare (e.g. hospital based neurologist, orthopedic  
146 surgeon), hospitalization, complementary care (e.g. acupuncture, dry needling, massage) as well as the use  
147 of both prescribed and over the counter medication. Questions were adapted based on the iMTA medical  
148 consumption questionnaire (36). Healthcare consumption characteristics will be valued in accordance with  
149 costing guidelines of each participating country, such as the Dutch Manual of Costing (37).

150 Chiropractor-related factors: These variables will be obtained from the chiropractors themselves: 1)  
151 sociodemographic (age, gender), school attended (school, year of graduation), and types of treatments  
152 commonly delivered in their practice.

153 In the Netherlands and in Sweden, each chiropractor will be asked to fill in several questions about their  
154 expectations of patient recovery. This will be asked at the first four treatment visits.

155

## 156 *Statistical analyses*

157 Descriptive analyses: Baseline variables will be presented as percentages for categorical variables and as  
158 means plus standard deviations for continuous variables. In case of non-normal distributions, continuous  
159 variables will be described as medians with corresponding interquartile ranges. Furthermore, descriptive  
160 information of the primary and secondary outcome variables will be presented for baseline and all follow-  
161 up intervals. Descriptive analyses will be conducted for the entire data set from all participating countries  
162 as well as stratified for each country.

163 The primary objective will be answered using the entire data set from all participating countries and  
164 subsequently stratified by country.

165 In addition, the primary objective will be answered for each primary outcome separately by multilevel  
166 models with three levels (observations over time clustered within patients, clustered within practices).  
167 Country will be included as a covariate in the models (as dummy variables) (38). The models will thus

168 include time as a continuous variable as well as country as independent variables. Potential need for time  
169 squared and time cubed will be investigated by assessing the significance level of the quadratic and/or cubic  
170 terms. A random intercept will be included a priori. The need for a random slope for time will be  
171 investigated by the likelihood ratio test, in a stepwise manner (38).

172 The clinical course of pain and back-specific functional status will be analyzed by linear multilevel models,  
173 global perceived effect by logistic multilevel models and healthcare costs by a linear multilevel model with  
174 bootstrapped confidence intervals because of the expected skewed distribution of the cost data. We will  
175 report regression coefficients (linear models), odds ratios (logistic models), corresponding 95% confidence  
176 intervals and two-sided p-values.



## 177 **Discussion**

178 This study is to our knowledge the first large-scale, prospective, multicenter, international study to be  
179 conducted in a chiropractic setting and the first one focusing on older adults with low back pain consulting  
180 a chiropractor. The primary objectives of the BACE-C study are to examine the clinical course over one  
181 year of the intensity, healthcare costs and improvement rates of low back pain in people 55 and older who  
182 visit a chiropractor for a new episode of low back pain. By understanding the impacts of various factors on  
183 the course and treatment of low back pain in the elderly population, this large data set will allow us to  
184 provide input for the development of future feasibility intervention studies in this patient group. We invite  
185 other research groups worldwide to join the BACE-C consortium.

186

### 187 *Data Management, Storage and Security*

188 Data will be stored on institutional network drives with firewalls and security measures in place according  
189 to national and European Union data protection regulations. Hard copy records will be stored in a locked  
190 cabinet in a secure location. Access to records and data will be limited to study personnel. Study data will  
191 be de-identified and a master log file with identifiers will be kept and stored separately from the data. Only  
192 anonymized data will be used for analyses.

193

### 194 *Declarations*

#### 195 *Ethics approval and consent to participate*

196 This protocol has received ethical approval from the Medical Ethics Committee of the Vrije University  
197 Medical Center number, the Netherlands ethics number 2017-618, the Karolinska Institutet, Sweden ethics  
198 number 2018/474-31/2 and the Science & Engineering Subcommittee, Human Research Ethics Committee  
199 at Macquarie University, Australia, Project ID 5460. Currently the UK are awaiting ethics approval.

#### 200 *Consent for publication*

201 Written informed consent was obtained from the patient for publication of their individual details and  
202 accompanying images in this manuscript. The consent form is held by the authors' institution in a secured  
203 server and is available for review by the Editor-in-Chief.

#### 204 *Availability of Supporting Data*

205 Data sharing is not applicable to this article as no datasets were generated or analyzed during the current  
206 study.

### 207 *Competing interests*

208 ADJ, KD and SMR work as chiropractors in private practice. MvT and SMR received grants from the  
209 European Chiropractors' Union (ECU), the European Centre for Chiropractic Research Excellence  
210 (ECCRE), the Belgian Chiropractic Association (BVC) and the Netherlands Chiropractic Association  
211 (NCA) for his position at the Vrije Universiteit Amsterdam. JH has received grants from ECCRE and the  
212 Danish Chiropractor's Research Foundation. SDF has received funding from the Canadian Chiropractic  
213 Research Foundation, the Australian Chiropractors' Association and the Chiropractic Australia Research  
214 Foundation. IA has received grants from the Institut för Kiropraktisk och Neuromuskuloskeltal forskning.  
215 KD has received funding from Australian Chiropractic Association. DN and JF has received funding from  
216 the Chiropractic Research Council.

### 217 *Funding*

218 All research groups have obtained funding for their national study, separately. The Dutch study is funded  
219 by European Centre for chiropractic research excellence (ECCRE), located in Odense, Denmark (grant  
220 number 01-2016-NL/MvT) as well as funded by the Nederlandse Chiropractic Association (NCA) located  
221 in Joure, Netherlands. The Swedish study is funded by Institut för Kiropraktisk och Neuromuskuloskeltal  
222 forskning, located in Stockholm, Sweden (grant number 802477-4724). The British study is funded by  
223 Chiropractic Research Council, located in Lkangefni Gwynedd, UK (grant number CRC0003). The  
224 Australian study is funded by the Australian Chiropractic Association, located in Sydney, Australia.

### 225 *Authors' contributions*

226 Concept and design: Alan Jenks, Trynke Hoekstra, Bart Koes, Maurits van Tulder, Sidney Rubinstein  
227 Drafting of this manuscript: Alan Jenks, Trynke Hoekstra, Maurits van Tulder, Sidney Rubinstein  
228 Critical revision of the article for important intellectual content: All members  
229 Final approval of the article: All members

### 230 *Acknowledgements*

231 We would like to thank all the original authors of the BACE consortium in the Netherlands, Brazil and  
232 Australia for their input and suggestions. Additionally, we thank Jen Walraven, Mojdeh Khorrami and  
233 Mariana Fadil Romao for their comments on drafts of this manuscript.

234 *Corresponding author*

235 Alan Jenks: Vrije Universiteit Amsterdam, Department of Health Sciences, Faculty of Science, De  
236 Boelelaan 1085, room WN U601, 1081HV Amsterdam, The Netherlands +31 20 59 88865 [a.d.jenks@vu.nl](mailto:a.d.jenks@vu.nl)

## 237 **References**

- 238 1. Hoy D, March L, Brooks P, Blyth F, Woolf A, Bain C, et al. The global burden of low back pain:  
239 Estimates from the Global Burden of Disease 2010 study. *Ann Rheum Dis*. 2014;73(6):968–74.
- 240 2. Buchbinder R, van Tulder M, Öberg B, Costa LM, Woolf A, Schoene M, et al. Low back pain: a  
241 call for action. Vol. 391, *The Lancet*. 2018.
- 242 3. Cedraschi C, Luthy C, Allaz A-F, Herrmann F, Ludwig C. The impact of low back pain on health-  
243 related quality of life in seniors living in the community. *Eur spine journal Conf Annu Congr*  
244 *EUROSPINE 2017 Irel* [Internet]. 2017;26(2 Supplement 1):S305. Available from:  
245 <http://onlinelibrary.wiley.com/o/cochrane/clcentral/articles/767/CN-01421767/frame.html>
- 246 4. Hartvigsen J, Frederiksen H, Christensen K. Back and neck pain in seniors - Prevalence and  
247 impact. *Eur Spine J*. 2006;15(6):802–6.
- 248 5. Manogharan S, Kongsted A, Ferreira ML, Hancock MJ. Do older adults with chronic low back  
249 pain differ from younger adults in regards to baseline characteristics and prognosis? *Eur J Pain*  
250 (United Kingdom). 2017;21(5):866–73.
- 251 6. Walker BF, Muller R, Grant WD. Low back pain in Australian adults. Health provider utilization  
252 and care seeking. *J Manipulative Physiol Ther*. 2004;27(5):327–35.
- 253 7. Williams JS, Ng N, Peltzer K, Yawson A, Biritwum R, Maximova T, et al. Risk factors and  
254 disability associated with low back pain in older adults in low- and middle-income countries.  
255 Results from the WHO study on global AGEing and adult health (SAGE). *PLoS One*.  
256 2015;10(6):1–21.
- 257 8. Rudy TE, Weiner DK, Lieber SJ, Slaboda J, Boston JR. The impact of chronic low back pain on  
258 older adults: A comparative study of patients and controls. *Pain*. 2007;131(3):293–301.
- 259 9. Hartvigsen J, Hancock MJ, Kongsted A, Louw Q, Ferreira ML, Genevay S, et al. What low back  
260 pain is and why we need to pay attention. *Lancet*. 2018;391(10137):2356–67.
- 261 10. Beliveau PJH, Wong JJ, Sutton DA, Simon N Ben, Bussièrès AE, Mior SA, et al. The chiropractic

- 262 profession: A scoping review of utilization rates, reasons for seeking care, patient profiles, and  
263 care provided. *Chiropr Man Ther*. 2017;25(1):1–17.
- 264 11. Hebert JJ, Stomski NJ, French SD, Rubinstein SM. Serious Adverse Events and Spinal  
265 Manipulative Therapy of the Low Back Region: A Systematic Review of Cases. *J Manipulative*  
266 *Physiol Ther* [Internet]. 2015;38(9):677–91. Available from:  
267 <http://dx.doi.org/10.1016/j.jmpt.2013.05.009>
- 268 12. Rubinstein SM, Terwee CB, Assendelft WJJ, de Boer MR, van Tulder MW. Spinal Manipulative  
269 Therapy for Acute Low Back Pain. *Spine (Phila Pa 1976)* [Internet]. 2013;38(3):E158–77.  
270 Available from:  
271 [http://content.wkhealth.com/linkback/openurl?sid=WKPTLP:landingpage&an=00007632-](http://content.wkhealth.com/linkback/openurl?sid=WKPTLP:landingpage&an=00007632-201302010-00020)  
272 [201302010-00020](http://content.wkhealth.com/linkback/openurl?sid=WKPTLP:landingpage&an=00007632-201302010-00020)
- 273 13. Rubinstein SM, Middelkoop M Van, Boer MR De, Tulder MW Van, van Middelkoop M,  
274 Assendelft WJ, et al. Spinal Manipulative Therapy for Chronic. *Spine (Phila Pa 1976)* [Internet].  
275 2011;36(2):2–5. Available from:  
276 <http://www.ncbi.nlm.nih.gov/pubmed/21328304>5Cn[http://onlinelibrary.wiley.com/doi/10.1002/](http://onlinelibrary.wiley.com/doi/10.1002/14651858.CD008112.pub2/pdf/standard)  
277 [14651858.CD008112.pub2/pdf/standard](http://onlinelibrary.wiley.com/doi/10.1002/14651858.CD008112.pub2/pdf/standard)
- 278 14. Vos T, Flaxman AD, Naghavi M, Lozano R, Michaud C, Ezzati M, et al. Years lived with  
279 disability (YLDs) for 1160 sequelae of 289 diseases and injuries 1990–2010: A systematic analysis  
280 for the Global Burden of Disease Study 2010. *Lancet*. 2012;380(9859):2163–96.
- 281 15. de Luca KE, Fang SH, Ong J, Shin KS, Woods S, Tuchin PJ. The Effectiveness and Safety of  
282 Manual Therapy on Pain and Disability in Older Persons With Chronic Low Back Pain: A  
283 Systematic Review. *J Manipulative Physiol Ther* [Internet]. 2017;40(7):527–34. Available from:  
284 <https://doi.org/10.1016/j.jmpt.2017.06.008>
- 285 16. Moore C, Swain M, Luca K De, Hartvigsen J, Wong AYL. Characteristics of chiropractors who  
286 manage people aged 65 and older : A nationally representative sample of 1903 chiropractors.  
287 2019;(February):1–9.
- 288 17. Weigel P, Hockenberry JM, Bentler SE, Obrizan M, Kaskie B, Jones MP, et al. A longitudinal  
289 study of chiropractic use among older adults in the United States. *Chiropr Osteopat* [Internet].  
290 2010;18(1):34. Available from: [http://chiromt.biomedcentral.com/articles/10.1186/1746-1340-18-](http://chiromt.biomedcentral.com/articles/10.1186/1746-1340-18-34)  
291 [34](http://chiromt.biomedcentral.com/articles/10.1186/1746-1340-18-34)

- 292 18. Weigel PAM, Hockenberry JM, Wolinsky FD. Chiropractic use in the medicare population:  
293 Prevalence, patterns, and associations with 1-year changes in health and satisfaction with care. *J*  
294 *Manipulative Physiol Ther.* 2014;37(8):542–51.
- 295 19. Goertz CM., Salsbury SA., Vining RD., Long CR., Andresen AA., Jones ME., et al. Collaborative  
296 Care for Older Adults with low back pain by family medicine physicians and doctors of  
297 chiropractic (COCO): Study protocol for a randomized controlled trial. *Trials* [Internet].  
298 2013;14(1):1–18. Available from: [http://www.scopus.com/inward/record.url?eid=2-s2.0-](http://www.scopus.com/inward/record.url?eid=2-s2.0-84872196848&partnerID=40&md5=cd0b06c1cf5da88d346f6c99fa6cbf30)  
299 [84872196848&partnerID=40&md5=cd0b06c1cf5da88d346f6c99fa6cbf30](http://www.scopus.com/inward/record.url?eid=2-s2.0-84872196848&partnerID=40&md5=cd0b06c1cf5da88d346f6c99fa6cbf30)
- 300 20. Carvalho FA, Morelhão PK, Franco MR, Maher CG, Smeets RJEM, Oliveira CB, et al. Reliability  
301 and validity of two multidimensional self-reported physical activity questionnaires in people with  
302 chronic low back pain. *Musculoskelet Sci Pract.* 2017;27:65–70.
- 303 21. The Association Between Cigarette Smoking and Back Pain in Adults.
- 304 22. Weitkunat R, Coggins CRE, Sponsiello-Wang Z, Kallischnigg G, Dempsey R. Assessment of  
305 cigarette smoking in epidemiologic studies. *Beitrage zur Tab Int Contrib to Tob Res.*  
306 2013;25(7):638–48.
- 307 23. Frank D, DeBenedetti AF, Volk RJ, Williams EC, Kivlahan DR, Bradley KA. Effectiveness of the  
308 AUDIT-C as a screening test for alcohol misuse in three race/ethnic groups. *J Gen Intern Med.*  
309 2008;23(6):781–7.
- 310 24. Buysse DJ, Charles F, Reynolds III, Monk T, Berman S, Kupfer D. The Pittsburgh Sleep Quality  
311 Index: A new Instrument for Psychiatric Practic and Research. *Psychiatry Res* [Internet].  
312 1988;(28):193–213. Available from:  
313 <http://www.ncbi.nlm.nih.gov/pmc/articles/PMC3023245/>0A[http://dx.doi.org/10.1016/S0735-](http://dx.doi.org/10.1016/S0735-1097(01)01746-6)  
314 [1097\(01\)01746-](http://dx.doi.org/10.1016/S0735-1097(01)01746-6)  
315 [6%0Ahttp://eutils.ncbi.nlm.nih.gov/entrez/eutils/elink.fcgi?dbfrom=pubmed%7B%7Ddid=27487](http://eutils.ncbi.nlm.nih.gov/entrez/eutils/elink.fcgi?dbfrom=pubmed%7B%7Ddid=2748771%7B%7Dretmode=ref%7B%7Dcmd=prlinks%0Ahttp://dx.doi.org/10.1016)  
316 [71%7B%7Dretmode=ref%7B%7Dcmd=prlinks%0Ahttp://dx.doi.org/10.1016](http://eutils.ncbi.nlm.nih.gov/entrez/eutils/elink.fcgi?dbfrom=pubmed%7B%7Ddid=2748771%7B%7Dretmode=ref%7B%7Dcmd=prlinks%0Ahttp://dx.doi.org/10.1016)
- 317 25. Sangha O, Stucki G, Liang MH, Fossel AH, Katz JN. The self-administered comorbidity  
318 questionnaire: A new method to assess comorbidity for clinical and health services research.  
319 *Arthritis Rheum.* 2003;49(2):156–63.
- 320 26. Jasper D. Bier, Raymond W.J.G. Ostelo, Miranda L. van Hooff, Bart W. Koes APV. Validity and  
321 Reproducibility of the STarT Back Tool (Dutch Version) in Patients With Low Back Pain in

- 322 Primary Care Settings. 2017;97(6):659–68.
- 323 27. Greenspan SL, Bouxsein ML, Melton ME, Kolodny a H, Clair JH, Delucca PT, et al. Precision  
324 and discriminatory ability of calcaneal bone assessment technologies. *J Bone Miner Res* [Internet].  
325 1997;12(8):1303–13. Available from: <http://www.ncbi.nlm.nih.gov/pubmed/9258762>
- 326 28. Mangen MJJ, Bolkenbaas M, Huijts SM, van Werkhoven CH, Bonten MJM, de Wit GA. Quality  
327 of life in community-dwelling Dutch elderly measured by EQ-5D-3L. *Health Qual Life Outcomes*  
328 [Internet]. 2017;15(1):1–6. Available from: <http://dx.doi.org/10.1186/s12955-016-0577-5>
- 329 29. Whynes DK, McCahon RA, Ravenscroft A, Hodgkinson V, Evley R, Hardman JG.  
330 Responsiveness of the EQ-5D health-related quality-of-life instrument in assessing low back pain.  
331 *Value Heal* [Internet]. 2013;16(1):124–32. Available from:  
332 <http://dx.doi.org/10.1016/j.jval.2012.09.003>
- 333 30. Podsiadlo D, Richardson S. The Timed “Up & Go”: A Test of Basic Functional Mobility for  
334 Frail Elderly Persons. *J Am Geriatr Soc* [Internet]. 1991;39(2):142–8. Available from:  
335 <http://doi.wiley.com/10.1111/j.1532-5415.1991.tb01616.x>
- 336 31. Dobson F. Timed Up and Go test in musculoskeletal conditions. *J Physiother* [Internet].  
337 2015;61(1):47. Available from: <http://dx.doi.org/10.1016/j.jphys.2014.11.003>
- 338 32. Von Korff M, Jensen MP, Karoly P. Assessing global pain severity by self-report in clinical and  
339 health services research. *Spine (Phila Pa 1976)*. 2000;25(24):3140–51.
- 340 33. Chiarotto A, Boers M, Deyo RA, Buchbinder R, Corbin TP, Costa LOP, et al. Core outcome  
341 measurement instruments for clinical trials in nonspecific low back pain. *Pain* [Internet].  
342 2018;159(3):1. Available from: <http://insights.ovid.com/crossref?an=00006396-900000000-99091>
- 343 34. Luijsterburg PA, Verhagen AP, Ostelo RW, van den Hoogen HJ, Peul WC, Avezaat CJ, et al.  
344 Conservative treatment in patients with an acute lumbosacral radicular syndrome: design of a  
345 randomised clinical trial [ISRCTN68857256]. *BMC Musculoskelet Disord* [Internet].  
346 2004;5(1):39. Available from:  
347 <http://bmcmusculoskeletdisord.biomedcentral.com/articles/10.1186/1471-2474-5-39>
- 348 35. Scheele J, Luijsterburg PA, Ferreira ML, Maher CG, Pereira L, Peul WC, et al. Back complaints in  
349 the elders (BACE); design of cohort studies in primary care: an international consortium. *BMC*  
350 *Musculoskelet Disord* [Internet]. 2011;12:193. Available from:

- 351 <http://www.ncbi.nlm.nih.gov/pubmed/21854620>
- 352 36. Bouwmans C, Krol M, Severens H, Koopmanschap M, Brouwer W, Roijen LH Van. The iMTA  
353 Productivity Cost Questionnaire: A Standardized Instrument for Measuring and Valuing Health-  
354 Related Productivity Losses. *Value Heal* [Internet]. 2015;18(6):753–8. Available from:  
355 <http://dx.doi.org/10.1016/j.jval.2015.05.009>
- 356 37. Kanters TA, Bouwmans CAM, Van Der Linden N, Tan SS, Hakkaart-van Roijen L. Update of the  
357 Dutch manual for costing studies in health care. *PLoS One*. 2017;12(11):1–11.
- 358 38. Twisk JWR. *Applied Mixed Model Analysis* [Internet]. Cambridge University Press; 2019.  
359 Available from: <https://www.cambridge.org/core/product/identifier/9781108635660/type/book>

360 **Figure 1**

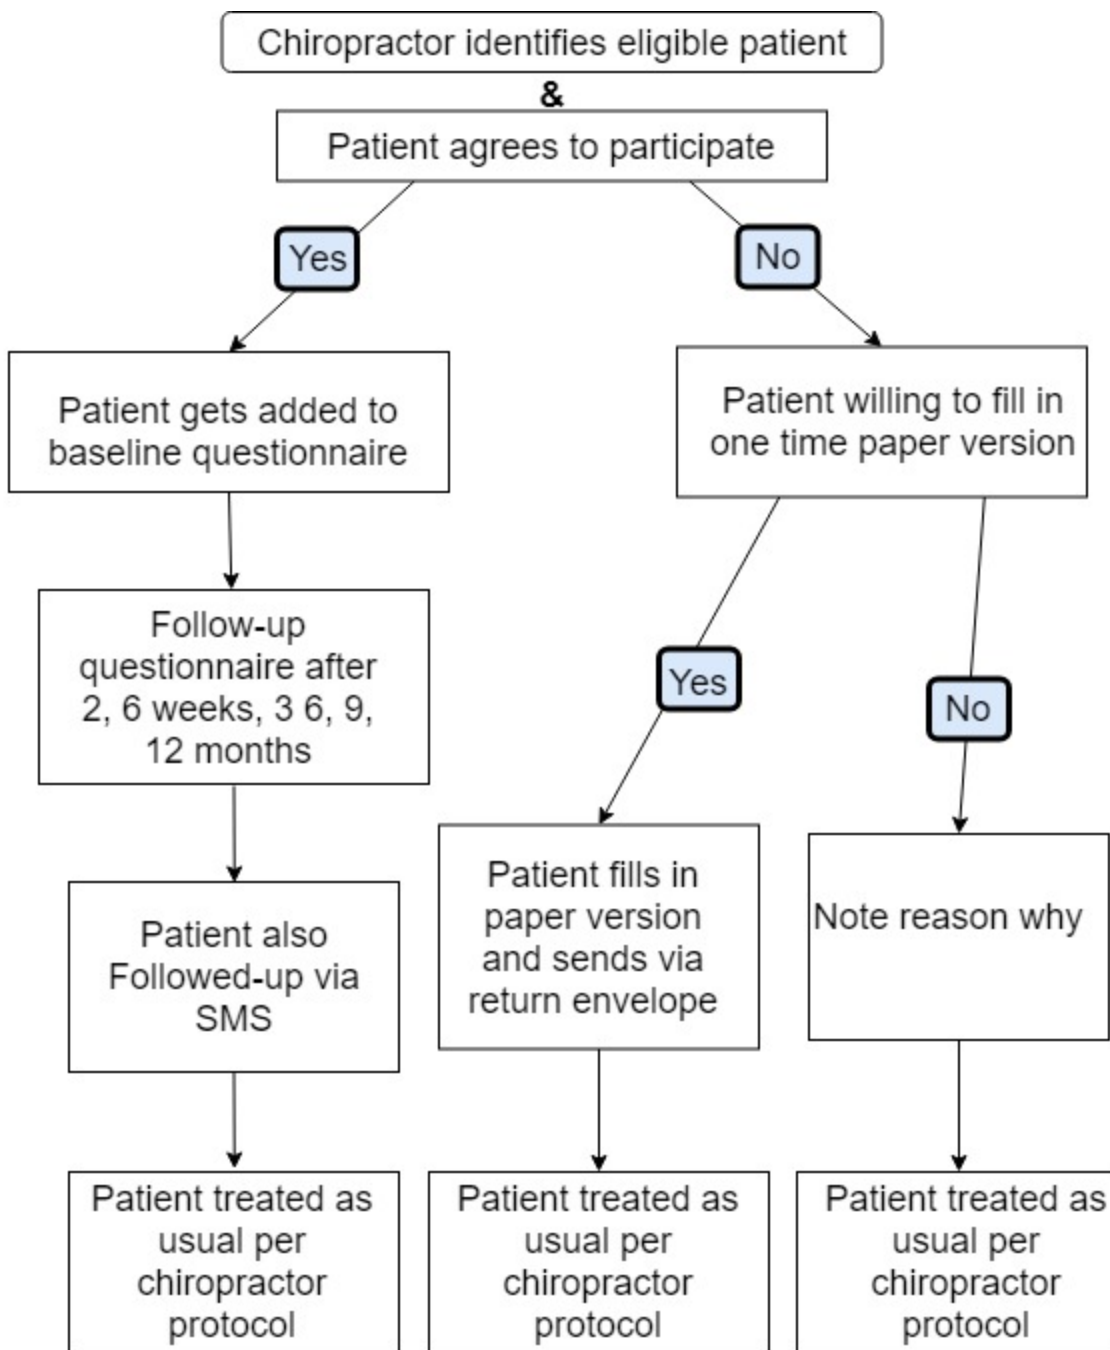

**Figure 1** Flow Chart of BACE-C Study

361

362

363 **Table 1: Content of the patient questionnaires**



| Demographics                                                          | Baseline | 2 weeks | 6 weeks | 3 months | 6 months | 9 months | 12 months |
|-----------------------------------------------------------------------|----------|---------|---------|----------|----------|----------|-----------|
| Age                                                                   | X        |         |         |          |          |          |           |
| Gender                                                                | X        |         |         |          |          |          |           |
| Ethnicity                                                             | X        |         |         |          |          |          |           |
| Education level                                                       | X        |         |         |          |          |          |           |
| Marital Status                                                        | X        |         |         |          |          |          |           |
| Weight (for BMI)                                                      | X        |         |         |          |          |          |           |
| Height (for BMI)                                                      | X        |         |         |          |          |          |           |
| <b>Primary Outcome Measures</b>                                       |          |         |         |          |          |          |           |
| Global Perceived Effect                                               |          | X       | X       | X        | X        | X        | X         |
| Recurrence of back pain                                               |          | X       | X       | X        | X        | X        | X         |
| Severity of pain (11-point numeric rating scale)                      | X        | X       | X       | X        | X        | X        | X         |
| Roland Morris Disability Questionnaire                                | X        | X       | X       | X        | X        | X        | X         |
| E5-Q5-DL                                                              | X        |         |         |          |          |          |           |
| Cost Evaluation/ Healthcare Satisfaction                              | X        | X       | X       | X        | X        | X        | X         |
| Adverse Events to Treatment                                           |          | X       | X       | X        | X        | X        | X         |
| <b>Pain Factors</b>                                                   |          |         |         |          |          |          |           |
| Duration, onset of symptoms, frequency, radiation, numbness, weakness | X        |         |         |          |          |          |           |
| <b>Expectations of recovery</b>                                       | X        |         |         |          |          |          |           |
| Satisfaction with the current physical condition                      | X        |         |         |          |          |          |           |
| <b>Lifestyle Factors</b>                                              |          |         |         |          |          |          |           |
| Physical activity: International Physical Activity Questionnaire      | X        |         |         |          |          |          |           |
| Smoking                                                               | X        |         |         |          |          |          |           |

|                                |   |  |  |  |  |  |  |
|--------------------------------|---|--|--|--|--|--|--|
| AUDIT-C Questionnaire          | X |  |  |  |  |  |  |
| Pittsburgh Sleep Quality Index | X |  |  |  |  |  |  |
| Comorbidity Questionnaire      | X |  |  |  |  |  |  |
| <b>Psychosocial Factors</b>    |   |  |  |  |  |  |  |
| STarT Back Screening Tool      | X |  |  |  |  |  |  |
| <b>Physical Exam</b>           |   |  |  |  |  |  |  |
| Get Up & Go Test               | X |  |  |  |  |  |  |

364

medRxiv preprint doi: <https://doi.org/10.1101/19068369>; this version posted October 4, 2019. The copyright holder for this preprint (which was not certified by peer review) is the author/funder, who has granted medRxiv a license to display the preprint in perpetuity. It is made available under aCC-BY-NC-ND 4.0 International license.

| Demographics                                                          | Baseline | 1 week | 3 months | 6 months | 9 months | 12 months | 18 months |
|-----------------------------------------------------------------------|----------|--------|----------|----------|----------|-----------|-----------|
| Age                                                                   | X        |        |          |          |          |           |           |
| Gender                                                                | X        |        |          |          |          |           |           |
| Ethnicity                                                             | X        |        |          |          |          |           |           |
| Education level                                                       | X        |        |          |          |          |           |           |
| Marital Status                                                        | X        |        |          |          |          |           |           |
| Weight (for BMI)                                                      | X        |        |          |          |          |           |           |
| Height (for BMI)                                                      | X        |        |          |          |          |           |           |
| <b>Primary Outcome Measures</b>                                       |          |        |          |          |          |           |           |
| Global Perceived Effect                                               |          | X      | X        | X        | X        | X         | X         |
| Recurrence of back pain                                               |          | X      | X        | X        | X        | X         | X         |
| Severity of pain (11-point numeric rating scale)                      | X        | X      | X        | X        | X        | X         | X         |
| Roland Morris Disability Questionnaire                                | X        | X      | X        | X        | X        | X         | X         |
| E5-Q5-DL                                                              | X        |        |          |          |          |           |           |
| Cost Evaluation/ Healthcare Satisfaction                              | X        | X      | X        | X        | X        | X         | X         |
| Adverse Events to Treatment                                           |          | X      | X        | X        | X        | X         | X         |
| <b>Pain Factors</b>                                                   |          |        |          |          |          |           |           |
| Duration, onset of symptoms, frequency, radiation, numbness, weakness | X        |        |          |          |          |           |           |
| <b>Expectations of recovery</b>                                       | X        |        |          |          |          |           |           |

medRxiv preprint doi: <https://doi.org/10.1101/19006559>; this version posted October 4, 2019. The copyright holder for this preprint (which was not certified by peer review) is the author/funder, who has granted medRxiv a license to display the preprint in perpetuity. It is made available under a [CC-BY-NC-ND 4.0 International license](https://creativecommons.org/licenses/by-nc-nd/4.0/).

|                                                                  |   |  |  |  |  |  |  |
|------------------------------------------------------------------|---|--|--|--|--|--|--|
| physical condition                                               |   |  |  |  |  |  |  |
| <b>Lifestyle Factors</b>                                         |   |  |  |  |  |  |  |
| Physical activity: International Physical Activity Questionnaire | X |  |  |  |  |  |  |
| Smoking                                                          | X |  |  |  |  |  |  |
| AUDIT-C Questionnaire                                            | X |  |  |  |  |  |  |
| Pittsburgh Sleep Quality Index                                   | X |  |  |  |  |  |  |
| Comorbidity Questionnaire                                        | X |  |  |  |  |  |  |
| <b>Psychosocial Factors</b>                                      |   |  |  |  |  |  |  |
| STarT Back Screening Tool                                        | X |  |  |  |  |  |  |
| <b>Physical Exam</b>                                             |   |  |  |  |  |  |  |
| Get Up & Go Test                                                 | X |  |  |  |  |  |  |

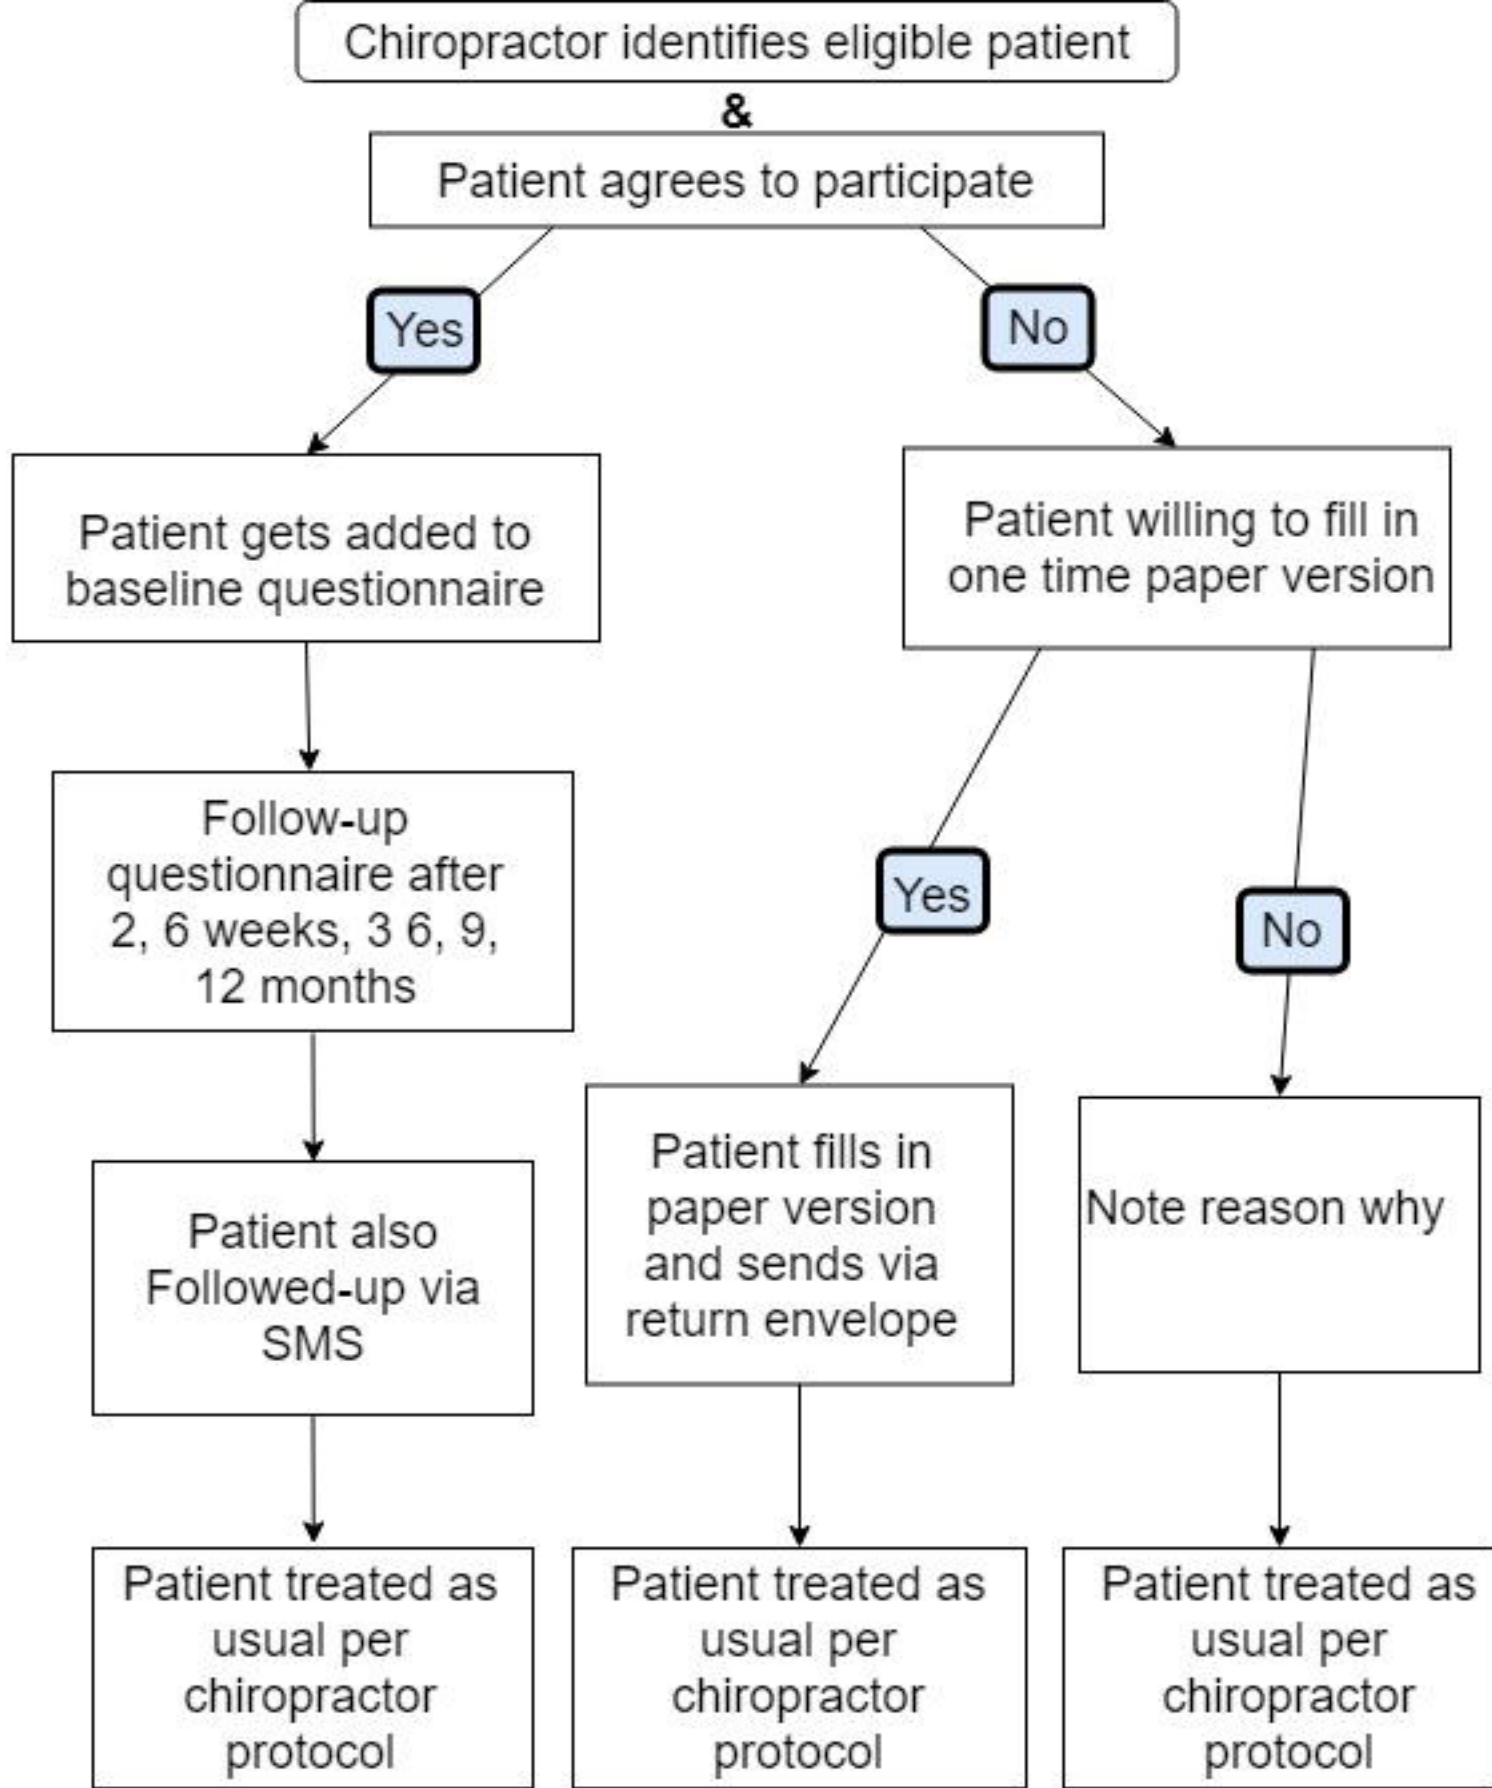

**Figure 1** Flow Chart of BACE-C Study
